# Supplementary material
Source: HighWire-hosted journal article supplement (https://bmjopen.bmj.com/content/9/6/e028409)
Supplement: inline-supplementary-material-2 [file inline-supplementary-material-2.pdf]

Appendix 2. Distributions in all potential predictors, split by with and without readmission within 30 days of discharge.

| variable                                     | total          | with          | without         | P         |
|----------------------------------------------|----------------|---------------|-----------------|-----------|
| n                                            | 138'222        | 10'300 (7.5%) | 127'922 (92.5%) |           |
| PCG acid disorder (= yes)                    | 21'566 (15.6%) | 1'908 (18.5%) | 19'658 (15.4%)  | <0.001 "  |
| PCG bone disease (= yes)                     | 5'141 (3.7%)   | 473 (4.6%)    | 4'668 (3.6%)    | <0.001 "  |
| PCG cancer (= yes)                           | 2'952 (2.1%)   | 357 (3.5%)    | 2'595 (2.0%)    | <0.001 "  |
| PCG cardiac disease (= yes)                  | 66'075 (47.8%) | 5'657 (54.9%) | 60'418 (47.2%)  | <0.001 "  |
| PCG dementia (= yes)                         | 3'806 (2.8%)   | 277 (2.7%)    | 3'529 (2.8%)    | 0.707 "   |
| PCG diabetes (= yes)                         | 13'747 (9.9%)  | 1'278 (12.4%) | 12'469 (9.7%)   | <0.001 "  |
| PCG epilepsy (= yes)                         | 7'340 (5.3%)   | 635 (6.2%)    | 6'705 (5.2%)    | <0.001 "  |
| PCG glaucoma (= yes)                         | 9'172 (6.6%)   | 714 (6.9%)    | 8'458 (6.6%)    | 0.209 "   |
| PCG gout (= yes)                             | 4'959 (3.6%)   | 501 (4.9%)    | 4'458 (3.5%)    | <0.001 "  |
| PCG hiv (= yes)                              | 414 (0.3%)     | 36 (0.3%)     | 378 (0.3%)      | 0.348 "   |
| PCG hyperlipedemia (= yes)                   | 31'027 (22.4%) | 2'748 (26.7%) | 28'279 (22.1%)  | <0.001 "  |
| PCG intestinal inflammatory diseases (= yes) | 1'244 (0.9%)   | 135 (1.3%)    | 1'109 (0.9%)    | <0.001 "  |
| PCG iron deficiency (= yes)                  | 7'620 (5.5%)   | 602 (5.8%)    | 7'018 (5.5%)    | 0.127 "   |
| PCG migraine (= yes)                         | 2'304 (1.7%)   | 162 (1.6%)    | 2'142 (1.7%)    | 0.471 "   |
| PCG pain (= yes)                             | 20'348 (14.7%) | 1'858 (18.0%) | 18'490 (14.5%)  | <0.001 "  |
| PCG parkinsons disease (= yes)               | 2'444 (1.8%)   | 217 (2.1%)    | 2'227 (1.7%)    | 0.00818 " |
| PCG psychological disorder (= yes)           | 23'750 (17.2%) | 2'013 (19.5%) | 21'737 (17.0%)  | <0.001 "  |
| PCG psychosis (= yes)                        | 17'329 (12.5%) | 1'411 (13.7%) | 15'918 (12.4%)  | <0.001 "  |
| PCG respiratory disease (= yes)              | 29'840 (21.6%) | 2'330 (22.6%) | 27'510 (21.5%)  | 0.00832 " |
| PCG rheuma (= yes)                           | 4'429 (3.2%)   | 342 (3.3%)    | 4'087 (3.2%)    | 0.485 "   |
| PCG thyroid disease (= yes)                  | 9'095 (6.6%)   | 691 (6.7%)    | 8'404 (6.6%)    | 0.577 "   |
| PCG tuberculosis (= yes)                     | 147 (0.1%)     | 11 (0.1%)     | 136 (0.1%)      | 1 "       |
| number of PCG                                |                |               |                 | <0.001 "" |
| none                                         | 39'003 (28.2%) | 2'387 (23.2%) | 36'616 (28.6%)  |           |
| one                                          | 25'886 (18.7%) | 1'743 (16.9%) | 24'143 (18.9%)  |           |
| multiple                                     | 73'333 (53.1%) | 6'170 (59.9%) | 67'163 (52.5%)  |           |
| immunosuppressiva (= yes)                    | 29'721 (21.5%) | 2'412 (23.4%) | 27'309 (21.3%)  | <0.001 "  |
| neurological disorder (= yes)                | 6'226 (4.5%)   | 501 (4.9%)    | 5'725 (4.5%)    | 0.0677 "  |
| substance abuse (= yes)                      | 1'038 (0.8%)   | 92 (0.9%)     | 946 (0.7%)      | 0.0852 "  |
| prosthesis (= yes)                           | 810 (0.6%)     | 48 (0.5%)     | 762 (0.6%)      | 0.107 "   |
| functional restrictions (= yes)              | 3'692 (2.7%)   | 337 (3.3%)    | 3'355 (2.6%)    | <0.001 "  |
| emergency index admission (= yes)            | 40'058 (29.0%) | 3'869 (37.6%) | 36'189 (28.3%)  | <0.001 "  |
| number of emergency visits                   |                |               |                 | <0.001 "" |

|                             |                 |                |                 |            |
|-----------------------------|-----------------|----------------|-----------------|------------|
| never                       | 106'494 (77.0%) | 7'667 (74.4%)  | 98'827 (77.3%)  |            |
| once                        | 21'534 (15.6%)  | 1'700 (16.5%)  | 19'834 (15.5%)  |            |
| multiple                    | 10'194 (7.4%)   | 933 (9.1%)     | 9'261 (7.2%)    |            |
| costs general practitioners |                 |                |                 | <0.001 ""  |
| 0                           | 32'196 (23.3%)  | 2'307 (22.4%)  | 29'889 (23.4%)  |            |
| low                         | 79'519 (57.5%)  | 5'751 (55.8%)  | 73'768 (57.7%)  |            |
| high                        | 26'507 (19.2%)  | 2'242 (21.8%)  | 24'265 (19.0%)  |            |
| costs specialists           |                 |                |                 | <0.001 ""  |
| 0                           | 37'122 (26.9%)  | 2'890 (28.1%)  | 34'232 (26.8%)  |            |
| low                         | 75'825 (54.9%)  | 5'449 (52.9%)  | 70'376 (55.0%)  |            |
| high                        | 25'275 (18.3%)  | 1'961 (19.0%)  | 23'314 (18.2%)  |            |
| costs hospital outpatient   |                 |                |                 | <0.001 ""  |
| 0                           | 57'415 (41.5%)  | 4'072 (39.5%)  | 53'343 (41.7%)  |            |
| low                         | 60'605 (43.8%)  | 4'166 (40.4%)  | 56'439 (44.1%)  |            |
| high                        | 20'202 (14.6%)  | 2'062 (20.0%)  | 18'140 (14.2%)  |            |
| costs home care             |                 |                |                 | <0.001 ""  |
| 0                           | 131'275 (95.0%) | 9'619 (93.4%)  | 121'656 (95.1%) |            |
| low                         | 5'210 (3.8%)    | 499 (4.8%)     | 4'711 (3.7%)    |            |
| high                        | 1'737 (1.3%)    | 182 (1.8%)     | 1'555 (1.2%)    |            |
| costs medication outpatient |                 |                |                 | <0.001 ""  |
| 0                           | 12'661 (9.2%)   | 861 (8.4%)     | 11'800 (9.2%)   |            |
| low                         | 94'172 (68.1%)  | 6'455 (62.7%)  | 87'717 (68.6%)  |            |
| high                        | 31'389 (22.7%)  | 2'984 (29.0%)  | 28'405 (22.2%)  |            |
| costs laboratory            |                 |                |                 | <0.001 ""  |
| 0                           | 27'843 (20.1%)  | 1'828 (17.7%)  | 26'015 (20.3%)  |            |
| low                         | 82'787 (59.9%)  | 5'978 (58.0%)  | 76'809 (60.0%)  |            |
| high                        | 27'592 (20.0%)  | 2'494 (24.2%)  | 25'098 (19.6%)  |            |
| costs therapeutic devices   |                 |                |                 | <0.001 ""  |
| 0                           | 71'419 (51.7%)  | 4'917 (47.7%)  | 66'502 (52.0%)  |            |
| low                         | 50'104 (36.2%)  | 3'754 (36.4%)  | 46'350 (36.2%)  |            |
| high                        | 16'699 (12.1%)  | 1'629 (15.8%)  | 15'070 (11.8%)  |            |
| costs physiotherapy         |                 |                |                 | 0.00132 "" |
| 0                           | 107'920 (78.1%) | 8'178 (79.4%)  | 99'742 (78.0%)  |            |
| low                         | 22'726 (16.4%)  | 1'564 (15.2%)  | 21'162 (16.5%)  |            |
| high                        | 7'576 (5.5%)    | 558 (5.4%)     | 7'018 (5.5%)    |            |
| costs acute care hospital   |                 |                |                 | <0.001 ""  |
| 0                           | 130'733 (94.6%) | 9'533 (92.6%)  | 121'200 (94.7%) |            |
| low                         | 5'617 (4.1%)    | 532 (5.2%)     | 5'085 (4.0%)    |            |
| high                        | 1'872 (1.4%)    | 235 (2.3%)     | 1'637 (1.3%)    |            |
| costs psychiatry            |                 |                |                 | 0.527 ""   |
| 0                           | 137'590 (99.5%) | 10'260 (99.6%) | 127'330 (99.5%) |            |
| low                         | 474 (0.3%)      | 29 (0.3%)      | 445 (0.3%)      |            |

|                                          |                 |                |                 |           |
|------------------------------------------|-----------------|----------------|-----------------|-----------|
| high                                     | 158 (0.1%)      | 11 (0.1%)      | 147 (0.1%)      |           |
| costs rehabilitation                     |                 |                |                 | 0.0161 "" |
| 0                                        | 137'497 (99.5%) | 10'226 (99.3%) | 127'271 (99.5%) |           |
| low                                      | 544 (0.4%)      | 57 (0.6%)      | 487 (0.4%)      |           |
| high                                     | 181 (0.1%)      | 17 (0.2%)      | 164 (0.1%)      |           |
| costs nursing home                       |                 |                |                 | 0.503 ""  |
| 0                                        | 137'966 (99.8%) | 10'276 (99.8%) | 127'690 (99.8%) |           |
| low                                      | 192 (0.1%)      | 18 (0.2%)      | 174 (0.1%)      |           |
| high                                     | 64 (0.0%)       | 6 (0.1%)       | 58 (0.0%)       |           |
| number of outpatient visits              |                 |                |                 | <0.001 "" |
| 0                                        | 10'260 (7.4%)   | 812 (7.9%)     | 9'448 (7.4%)    |           |
| low                                      | 96'410 (69.8%)  | 6'690 (65.0%)  | 89'720 (70.1%)  |           |
| high                                     | 31'552 (22.8%)  | 2'798 (27.2%)  | 28'754 (22.5%)  |           |
| number of hospitalisations               |                 |                |                 | <0.001 "" |
| never                                    | 129'707 (93.8%) | 9'456 (91.8%)  | 120'251 (94.0%) |           |
| once                                     | 6'399 (4.6%)    | 579 (5.6%)     | 5'820 (4.5%)    |           |
| multiple                                 | 2'116 (1.5%)    | 265 (2.6%)     | 1'851 (1.4%)    |           |
| sex (= female)                           | 73'580 (53.2%)  | 4'808 (46.7%)  | 68'772 (53.8%)  | <0.001 "  |
| age group                                |                 |                |                 | <0.001 "" |
| .. - 29                                  | 8'729 (6.3%)    | 482 (4.7%)     | 8'247 (6.4%)    |           |
| 30 - 39                                  | 11'382 (8.2%)   | 616 (6.0%)     | 10'766 (8.4%)   |           |
| 40 - 49                                  | 16'683 (12.1%)  | 1'053 (10.2%)  | 15'630 (12.2%)  |           |
| 50 - 59                                  | 23'316 (16.9%)  | 1'627 (15.8%)  | 21'689 (17.0%)  |           |
| 60 - 69                                  | 28'581 (20.7%)  | 2'282 (22.2%)  | 26'299 (20.6%)  |           |
| 70 - 79                                  | 29'558 (21.4%)  | 2'418 (23.5%)  | 27'140 (21.2%)  |           |
| 80 - 89                                  | 17'288 (12.5%)  | 1'605 (15.6%)  | 15'683 (12.3%)  |           |
| 90 - ..                                  | 2'685 (1.9%)    | 217 (2.1%)     | 2'468 (1.9%)    |           |
| deductible (= high)                      | 114'727 (83.0%) | 8'750 (85.0%)  | 105'977 (82.8%) | <0.001 "  |
| health plan                              |                 |                |                 | <0.001 "" |
| standard                                 | 67'980 (49.2%)  | 5'375 (52.2%)  | 62'605 (48.9%)  |           |
| family doctor                            | 34'598 (25.0%)  | 2'560 (24.9%)  | 32'038 (25.0%)  |           |
| list                                     | 13'661 (9.9%)   | 940 (9.1%)     | 12'721 (9.9%)   |           |
| telemedicine w/<br>restrictions          | 7'800 (5.6%)    | 476 (4.6%)     | 7'324 (5.7%)    |           |
| telemedicine w/o<br>restrictions         | 14'183 (10.3%)  | 949 (9.2%)     | 13'234 (10.3%)  |           |
| additional hospital insurance<br>(= yes) | 32'013 (23.2%)  | 2'389 (23.2%)  | 29'624 (23.2%)  | 0.932 "   |
| language region                          |                 |                |                 | <0.001 "" |
| german                                   | 105'029 (76.0%) | 8'023 (77.9%)  | 97'006 (75.8%)  |           |
| french                                   | 20'251 (14.7%)  | 1'265 (12.3%)  | 18'986 (14.8%)  |           |
| italian                                  | 12'942 (9.4%)   | 1'012 (9.8%)   | 11'930 (9.3%)   |           |
| urban/rural (= urban)                    | 108'186 (78.3%) | 8'056 (78.2%)  | 100'130 (78.3%) | 0.882 "   |
| geographical region                      |                 |                |                 | <0.001 "" |

|                       |                 |               |                 |           |
|-----------------------|-----------------|---------------|-----------------|-----------|
| Zurich                | 33'861 (24.5%)  | 2'656 (25.8%) | 31'205 (24.4%)  |           |
| Lake Geneva           | 17'165 (12.4%)  | 1'057 (10.3%) | 16'108 (12.6%)  |           |
| Midland               | 25'790 (18.7%)  | 1'895 (18.4%) | 23'895 (18.7%)  |           |
| Northwest             | 21'009 (15.2%)  | 1'565 (15.2%) | 19'444 (15.2%)  |           |
| East                  | 19'330 (14.0%)  | 1'583 (15.4%) | 17'747 (13.9%)  |           |
| Ticino                | 12'562 (9.1%)   | 988 (9.6%)    | 11'574 (9.0%)   |           |
| Central               | 8'505 (6.2%)    | 556 (5.4%)    | 7'949 (6.2%)    |           |
| purchasing power      |                 |               |                 | 0.465 ""  |
| low                   | 35'181 (25.5%)  | 2'649 (25.7%) | 32'532 (25.4%)  |           |
| mid                   | 68'672 (49.7%)  | 5'141 (49.9%) | 63'531 (49.7%)  |           |
| high                  | 34'369 (24.9%)  | 2'510 (24.4%) | 31'859 (24.9%)  |           |
| number of relocations |                 |               |                 | 0.0501 "" |
| never                 | 128'520 (93.0%) | 9'631 (93.5%) | 118'889 (92.9%) |           |
| once                  | 9'217 (6.7%)    | 642 (6.2%)    | 8'575 (6.7%)    |           |
| multiple              | 485 (0.4%)      | 27 (0.3%)     | 458 (0.4%)      |           |

' ) Kruskal-Wallis test, " ) Fisher exact test, "" ) Chi-Square test
