# Supplementary material
Source: HighWire-hosted journal article supplement (https://bmjopen.bmj.com/content/9/6/e028409)
Supplement: inline-supplementary-material-3 [file inline-supplementary-material-3.pdf]

## Sensitivity analysis

We chose to show a simple and easily interpretable model in the manuscript, with all continuous variables categorised into factor variables. In a sensitivity analysis we performed a logistic regression without this categorisation. This model contained the same variables as the model in the manuscript (PCG cancer, PCG cardiac disease, PCG pain, emergency index admission, number of emergency visits, costs specialists, costs hospital outpatient, costs laboratory, costs therapeutic devices, costs physiotherapy, number of outpatient visits, sex, age group, geographical region). All continuous variables (number of emergency visits, costs specialists, costs hospital outpatient, costs laboratory, costs therapeutic devices, costs physiotherapy, and number of outpatient visits) were transformed (Yeo-Johnson transformation) and expanded in order to fit restricted cubic splines (with three knots). Age was not available as a continuous variable due to anonymisation measures.

The estimated coefficients of this model are in Table 7. Its discrimination was slightly better than the one in the model presented in the manuscript. It achieved an AUC of 0.61 (95%-CI: 0.60 - 0.62). This model was inferior to the model in the manuscript in terms of the calibration. Calibration-in-the-large was 1.83 (95%-CI: -0.15 - 3.82), the calibration slope was 0.78 (95%-CI: 0.56 - 0.99).

Table 7 Estimated coefficients logistic regression model with continuous variables

| Term                              | OR   | 95% CI        | P      |
|-----------------------------------|------|---------------|--------|
| (Intercept)                       | 0.04 | (0.03 - 0.04) | <0.001 |
| PCG cancer (= yes)                | 1.13 | (1.00 - 1.27) | 0.058  |
| PCG cardiac disease (= yes)       | 1.07 | (1.02 - 1.13) | 0.005  |
| PCG pain (= yes)                  | 1.15 | (1.08 - 1.22) | <0.001 |
| emergency index admission (= yes) | 1.49 | (1.43 - 1.56) | <0.001 |
| rcs(number of emergency visits)   | 1.05 | (0.99 - 1.12) | 0.109  |
| rcs(number of emergency visits)'  | 0.99 | (0.95 - 1.04) | 0.805  |
| rcs(costs specialists)            | 0.94 | (0.90 - 0.98) | 0.007  |
| rcs(costs specialists)'           | 1.01 | (0.96 - 1.07) | 0.672  |
| rcs(costs hospital outpatient)    | 0.88 | (0.83 - 0.93) | <0.001 |
| rcs(costs hospital outpatient)'   | 1.25 | (1.17 - 1.34) | <0.001 |
| rcs(costs laboratory)             | 1.02 | (0.97 - 1.07) | 0.412  |
| rcs(costs laboratory)'            | 1.11 | (1.06 - 1.15) | <0.001 |
| rcs(costs therapeutic devices)    | 1.01 | (0.95 - 1.07) | 0.834  |
| rcs(costs therapeutic devices)'   | 1.06 | (0.99 - 1.14) | 0.080  |
| rcs(costs physiotherapy)          | 1.00 | (0.86 - 1.18) | 0.965  |

|                                   |      |               |        |
|-----------------------------------|------|---------------|--------|
| rsc(costs physiotherapy)'         | 0.78 | (0.39 - 1.59) | 0.502  |
| rsc(number of outpatient visits)  | 0.99 | (0.98 - 1.00) | 0.021  |
| rsc(number of outpatient visits)' | 1.01 | (1.00 - 1.02) | 0.021  |
| sex (= male)                      | 1.29 | (1.24 - 1.35) | <0.001 |
| age group (= 30 - 39)             | 0.98 | (0.87 - 1.11) | 0.802  |
| age group (= 40 - 49)             | 1.17 | (1.05 - 1.31) | 0.006  |
| age group (= 50 - 59)             | 1.26 | (1.13 - 1.40) | <0.001 |
| age group (= 60 - 69)             | 1.42 | (1.28 - 1.58) | <0.001 |
| age group (= 70 - 79)             | 1.40 | (1.26 - 1.56) | <0.001 |
| age group (= 80 - 89)             | 1.54 | (1.37 - 1.72) | <0.001 |
| age group (= 90 - ..)             | 1.29 | (1.09 - 1.54) | 0.004  |
| region (= Lake Geneva)            | 0.74 | (0.68 - 0.79) | <0.001 |
| region (= Midland)                | 0.92 | (0.87 - 0.98) | 0.010  |
| region (= Northwest)              | 0.94 | (0.88 - 1.01) | 0.082  |
| region (= East)                   | 1.05 | (0.98 - 1.12) | 0.145  |
| region (= Ticino)                 | 0.95 | (0.88 - 1.02) | 0.178  |
| region (= Central)                | 0.81 | (0.74 - 0.90) | <0.001 |
